# Supplementary material
Source: PubMed Central journal article supplement (PMC3339576)
Supplement: sb200015u_si_002.pdf [file sb200015u_si_002.pdf]

Supplementary Figure 1: Fluorescence Polarization of weakly interacting SYNZIP pairs.  
Supplementary Figure 2: Fluorescence Polarization of self-interacting SYNZIP pairs.  
Supplementary Figure 3: Raw Fluorescence Polarization of interacting SYNZIP pairs.  
Supplementary Figure 4: SYNZIP constructs  
Supplementary Table 1: SYNZIP protein sequences

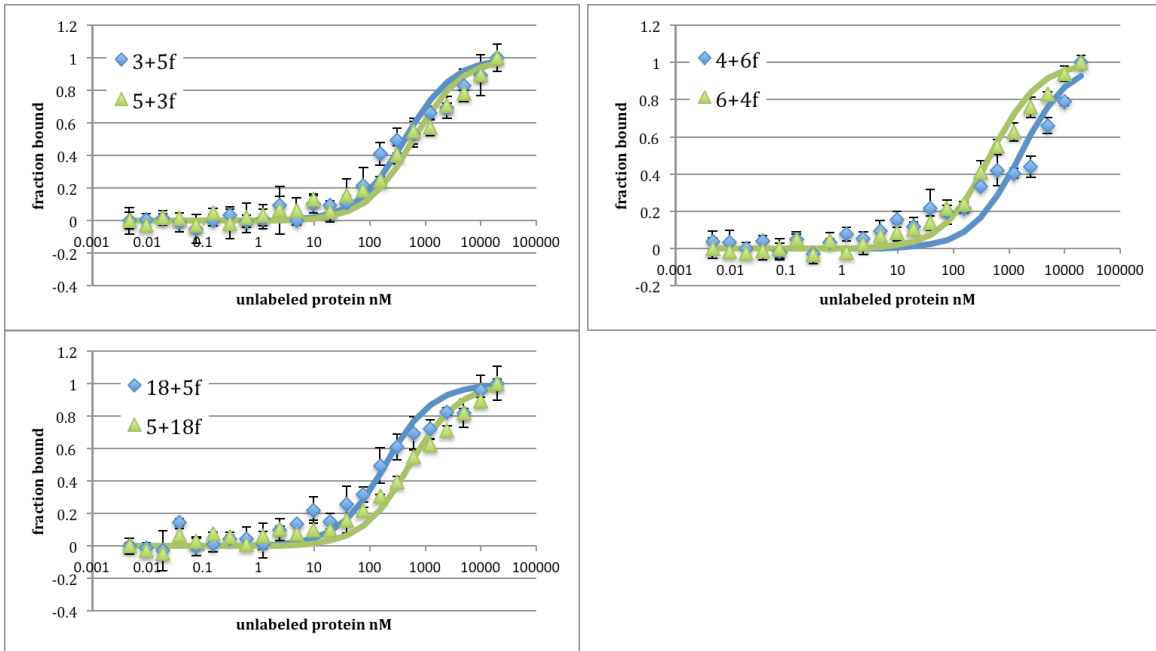

Supplementary Figure 1. Fluorescence Polarization of weakly interacting SYNZIP pairs. Each plot shows reciprocal measurements, with each interaction partner used in turn as the labeled species. The labeled species is indicated with an “f”. Error bars indicate  $\pm 1$  standard deviation over three replicates.

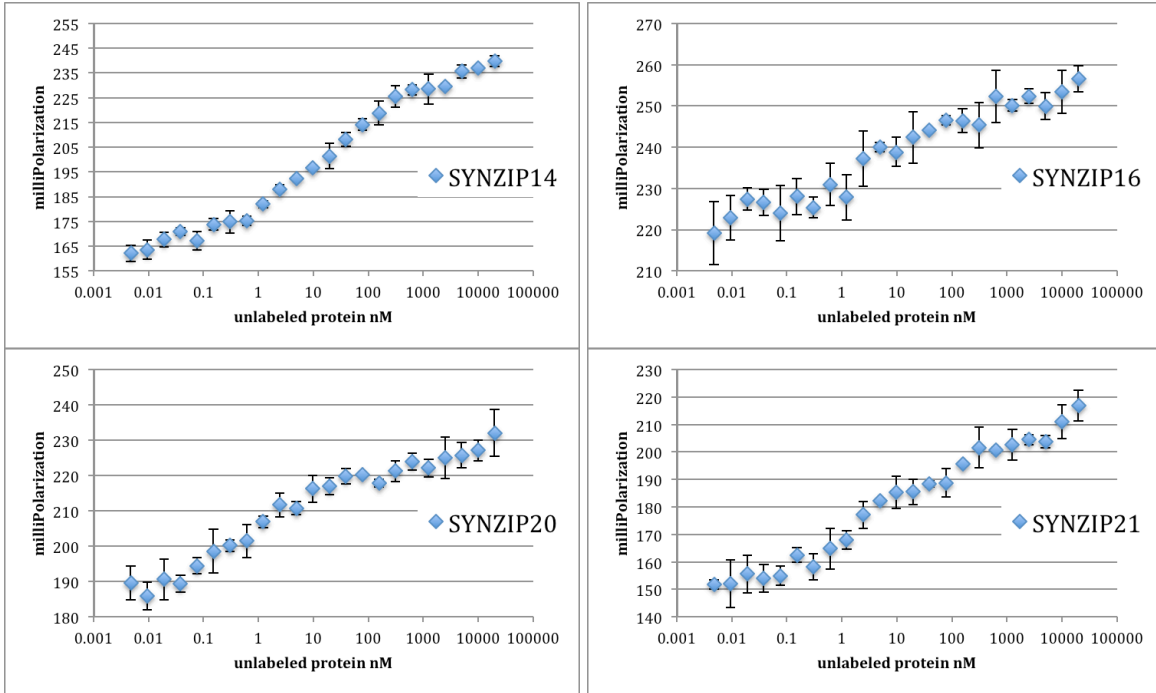

Supplementary Figure 2. Fluorescence Polarization of self-interacting SYNZIP pairs. Unlabeled MBP-SYNZIP is titrated against 10 nM labeled MBP-SYNZIP. Error bars indicate  $\pm 1$  standard deviation over three replicates.

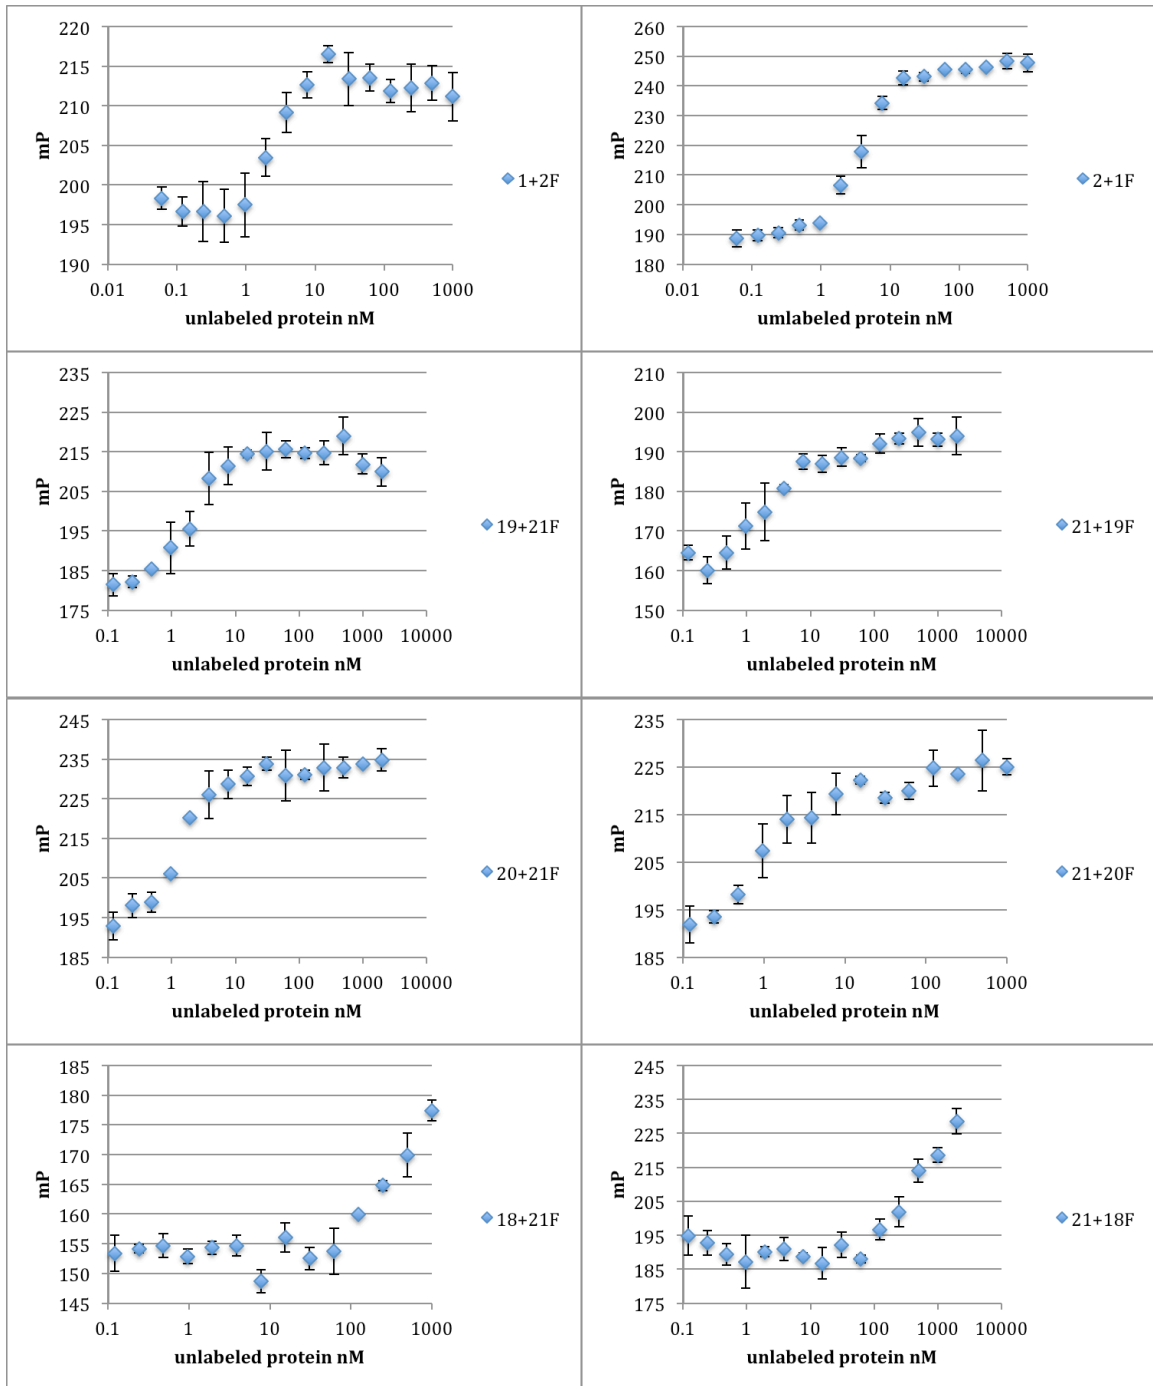

Supplementary Figure 3. Raw Fluorescence Polarization of interacting SYNZIP pairs. Unlabeled MBP-SYNZIP is titrated against 10 nM labeled MBP-SYNZIP. The labeled species is indicated with an “F”. Error bars indicate  $\pm 1$  standard deviation over three replicates.

| Vector     | Construct name | Construct Assembly                                                          |
|------------|----------------|-----------------------------------------------------------------------------|
| pENTR      | SZ#            | — attL1 — SYNZIP stop — attL2 —                                             |
| pENTR      | SZ#C           | — attL1 — SYNZIP GC — attL2 —                                               |
| pENTR      | CSZ#           | — attL1 — CG SYNZIP — attL2 —                                               |
| pDEST22    | ADSZ#          | — Gal4 activating domain — gateway linker — SYNZIP stop —                   |
| pDEST32    | DBSZ#          | — Gal4 DNA binding domain — gateway linker — SYNZIP stop —                  |
| pMalTevGWH | MBP-SZ#C       | — MBP — TEV — gateway linker — CG SYNZIP — gateway linker — 6X His — stop — |
| pMalTevGWH | MBP-CSZ#       | — MBP — TEV — gateway linker — SYNZIP GC — gateway linker — 6X His — stop — |

Supplementary Figure 3. SYNZIP cloning constructs. “#” indicates SYNZIP number. Boxes denoted attL1 and attL2 indicate gateway recombination region. Boxes denoted gateway linker indicate gateway recombination sites post recombination. Boxes denoted CG or GC indicate Cys-Gly added to SYNZIP sequences.

Supplementary Table 1. SYNZIP sequences

|          |                                                        |
|----------|--------------------------------------------------------|
| SYNZIP1  | NLVAQLENEVASLENENETLKKKNLHKKDLIAYLEKEIANLRKKIEE        |
| SYNZIP2  | ARNAYLRKKIARLKKDNLQLERDEQNLEKIIANLRDEIARLENEVASHEQ     |
| SYNZIP3  | NEVTTLENDAAFIENENAYLEKEIARLRKEKAALRNRLAHKK             |
| SYNZIP4  | QKVAELKNRVAVKLNREQLKKNVEELKNRNAYLKNELATLENEVARLENDVAE  |
| SYNZIP5  | NTVKELKNYIQELEERNAELKNLKEHLKFAKAELEFELAHHKFE           |
| SYNZIP6  | QKVAQLKNRVAYKLNENAKLENIVARLENDNANLEKDIANLEKDIANLERDVAR |
| SYNZIP7  | KEIEYLEKEIERLKDREHLKQDNAAHRQELNALRLEEAKLEFILAHLLST     |
| SYNZIP8  | KEIANLEKEIASLEKKVAVLKQRNAAHKQEVAALRKEIAYVEDEIQYVEDE    |
| SYNZIP9  | QKVESLKQKIEELKORKAQLKNDIANLEKEIAYAET                   |
| SYNZIP10 | NLLATLRSTAAVLENENHVLEKEKEKLRKEKEQLLNKLEAYK             |
| SYNZIP11 | ELTDELKNKKEALRKDNAALLNELASLENEIANLEKEIAYFK             |
| SYNZIP12 | NEDLVLENRLAALRNENAALENDLARLEKEIAYLEKEIEREK             |
| SYNZIP13 | QKVEELKNKIAELENRNAVKKNRVAHLKQEIAYLKDELAHEFE            |
| SYNZIP14 | NLDAYEREAEKLEKKNEVLRNRLAALLENELATLRQEVASMKQELQS        |
| SYNZIP15 | FENVTHEFILATLENENAKLRRLEAKLERELARLRNEVAWL              |
| SYNZIP16 | NILASLENKKEELKKLNAHLLKEIENLEKEIANLEKEIAYFK             |
| SYNZIP17 | NEKEELKSKKAELRNRIEQLKQKREQLKQKIANLRKEIEAYK             |
| SYNZIP18 | SIAATLENDLARLENENARLEKDIANLERDLAKLEREEAYF              |
| SYNZIP19 | NELESLENKKEELKNRNEELKQKREQLKQKLAALRNKLDAYKNRL          |
| SYNZIP20 | STVEELLRAIQELEKRNAELKNRKEELKNLVAHLRQELAHHKYE           |
| SYNZIP21 | NEVAQLENDVAVIENENAYLEKEIARLRKEIAALRDRRLAHKK            |
| SYNZIP22 | KRIAYLRKKIAALKKDNANLEKDIANLENEIERLIKEIKTLENEVASHEQ     |
